# Supplementary material
Source: PubMed Central journal article supplement (PMC7347292)
Supplement: NIHMS1525453-supplement-1.pdf [file NIHMS1525453-supplement-1.pdf]

## Supplemental Figure 1

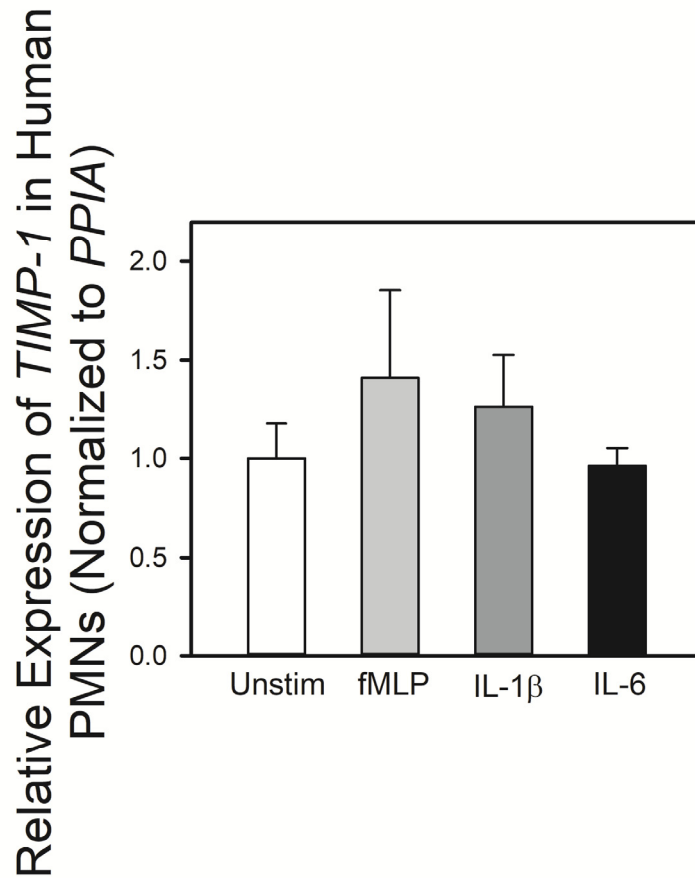

**Supplemental Figure 1: Steady state *TIMP-1* mRNA levels in PMNs after stimulated with fMLP, IL-1 $\beta$ , or IL-6.** PMNs isolated from healthy human donors (n = 3) were incubated for 30 min at 37°C with or without 10<sup>-7</sup> M fMLP, 10<sup>-7</sup> M IL-1 $\beta$  or 10<sup>-7</sup> M IL-6. Steady state *TIMP-1* mRNA levels were measured using qRT-RT-PCR using *PPIA* as the housekeeping control gene, and the  $\Delta\Delta C_T$  method. None of the agonists studied increased *TIMP-1* mRNA in PMNs. Data are mean  $\pm$  SEM; n = 3.

## Supplemental Figure 2

### Unstimulated PMNs

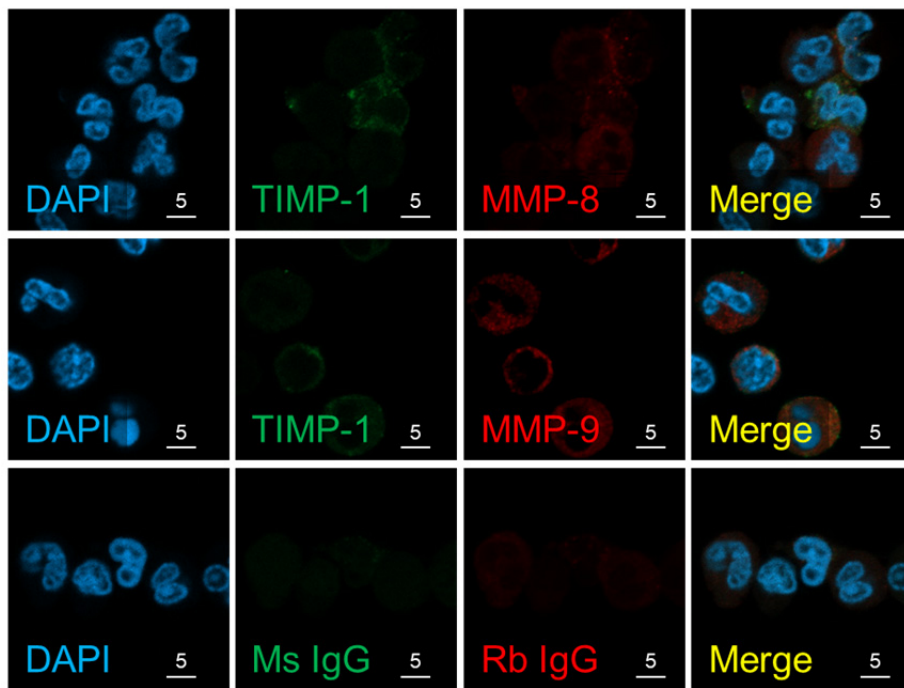

**Supplemental Figure 2: Minimal staining was detected on the surface of unstimulated PMNs.** PMNs were isolated from peripheral blood samples from healthy male and female human donors as described in Methods. Cells were double immunostained with Alexa 488 and murine anti-TIMP-1 IgG or non-immune murine (Ms) IgG (second panel) and with Alexa 546 and rabbit anti-MMP-8 IgG, or rabbit anti-MMP-9 IgG or rabbit (Rb) IgG (third panel). Nuclei in the cells were counterstained blue using 4',6-diamidino-2-phenylindole (DAPI, first panel). Co-localization of TIMP-1 and MMPs on the surface of the PMNs was assessed by confocal microscopy (see merged images in the fourth panels). The white bars are 5 microns in length. The results shown are representative of PMN preparations from 3 different donors.

### Supplemental Figure 3

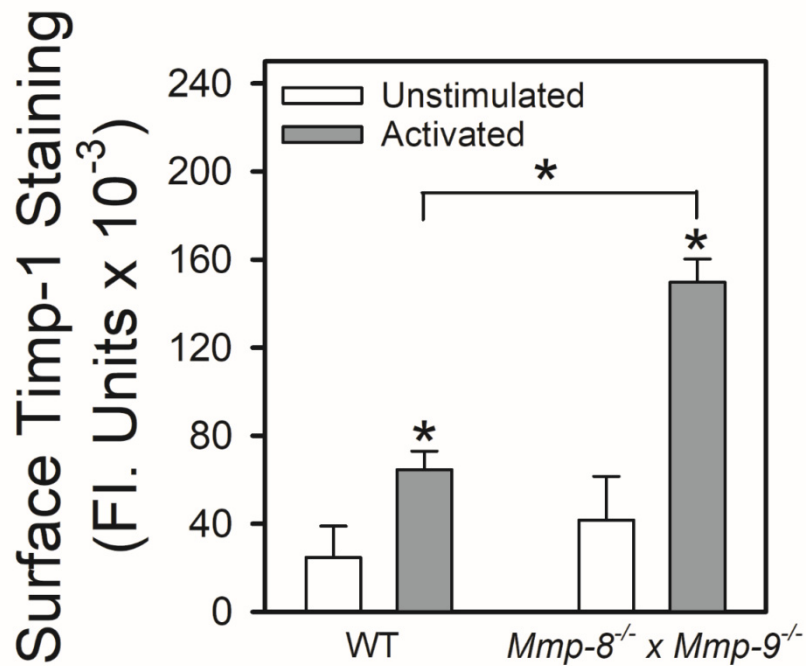

**Supplemental Figure 3: Timp-1 level is expressed on the surface of *Mmp-8*<sup>-/-</sup> x *Mmp-9*<sup>-/-</sup> PMNs.** PMNs isolated from WT and *Mmp-8*<sup>-/-</sup> x *Mmp-9*<sup>-/-</sup> mice were incubated at 37°C for 15 min with or without 10<sup>-6</sup> M PAF and then for 30 min with or without 10<sup>-6</sup> M fMLP. PMNs were then immunostained with Alexa 488 for surface Timp-1. Data are mean ± SEM; n = 150-200 cells/group. Asterisk indicates *P* < 0.001 compared with unstimulated control belonging to the same genotype or the group indicated. The data shown are representative of 3 independent experiments.

## Supplemental Figure 4

A

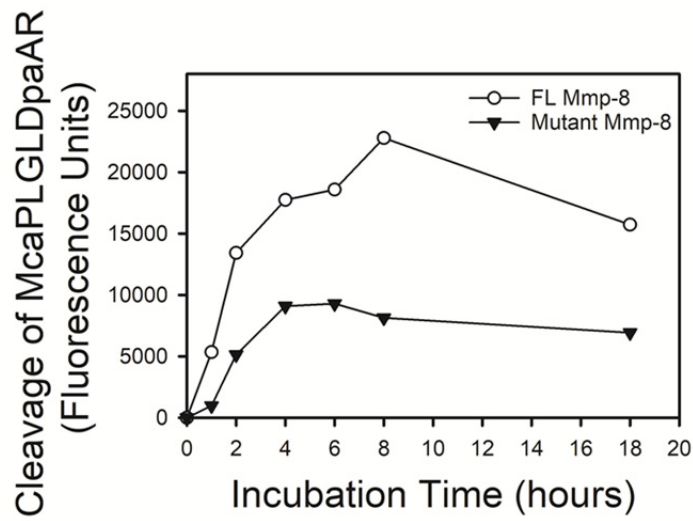

B

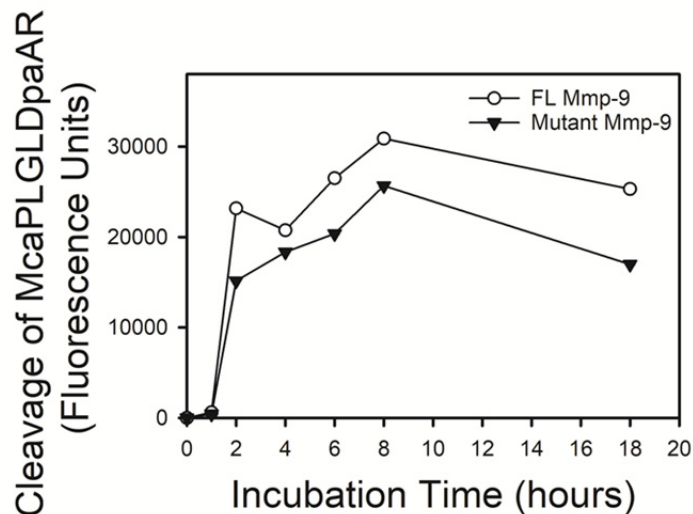

**Supplemental Figure 4: Recombinant full length proMmp-8 and proMmp-9 and mutant proMmp-8 and proMmp-9 lacking the COOH terminal hemopexin domain retain the capacity to be activated and degrade a susceptible substrate:** Equimolar amounts (50 nM) of full length (FL) proMmp-8, FL pro-Mmp-9 and mutant forms of these proMmps lacking the COOH-terminal hemopexin domain (Mutant Mmp-8 and Mutant Mmp-9) or assay buffer alone (as a control) were incubated in duplicate with a quenched fluorogenic substrate that is susceptible to cleavage by these Mmps (Mca-Pro-Leu-Gly-Leu-Dpa-Ala-Arg). Cleavage of the substrate was measured using fluorimetry.
